# Supplementary material for: Carboxymethyl chitosan coated medium-chain fatty acid nanoliposomes: structure, composition, stability and in vitro release investigation
Source: Royal Society of Chemistry journal article supplement (doi:10.1039/d1fo01985f), 2021-01-01
Supplement: d1fo01985f1.pdf [file d1fo01985f1.pdf]

## Supplementary information for the manuscript titled:

### “A carboxymethyl chitosan coated medium-chain fatty acid nanoliposome: its structural and compositional characterizations, stability and *in vitro* release investigation”

Authors: Huijuan Zheng,<sup>\*ab</sup> Weilin Liu,<sup>c</sup> Shuibing Yang<sup>d</sup>

#### SI-Material and methods

**Atomic force microscopy (AFM):** Tapping mode was applied for sample preparation. Properly diluted liposome samples were loaded onto the mica and dried under room temperature, and then the sample was placed on AJ-III (AFM, Shanghai AiJian Co., China). Probe with Si<sub>3</sub>N<sub>4</sub> material and a spring constant of 0.58 N/m.

**Turbidity determination:** Dilute the liposomes with PBS buffer ten times, and then measure the absorbance at 288 nm using a spectrophotometer at room temperature.

**pH determination:** Liposomes were measured at room temperature using Delta 320 pH meter.

**Differential scanning calorimetric (DSC):** Samples were weighed and placed in the pan, press and seal the pan with lid. The heating rate is 10°C/min, the initial equilibrium temperature is 20°C, the end temperature is 200°C, and the nitrogen flow rate is 20-30 mL/min.

#### SI-Results and Discussion

##### 1. AFM

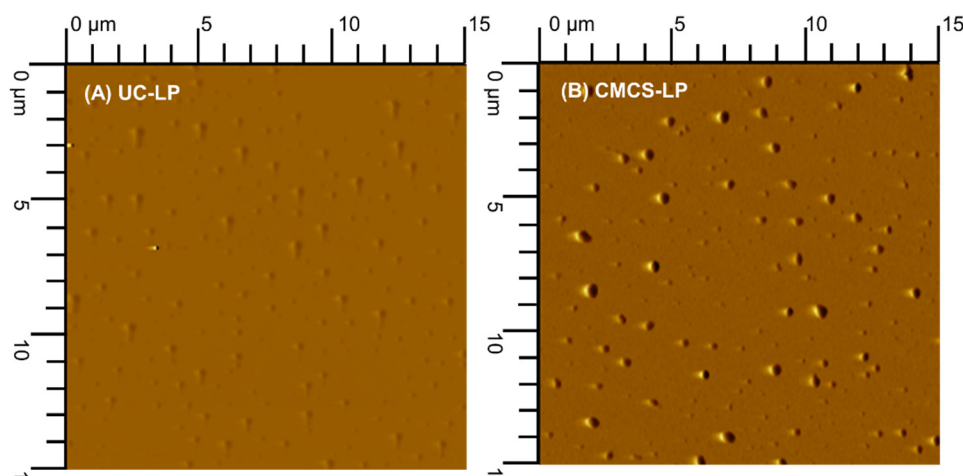

Figure S1. AFM figures of the UC-LP and CMCS-LP.

Round particles were observed, for Figure SI-1(A), the UC-LP has both small particles below 100 nm and some are larger than 100 nm, Figure SI-1 (B) showed more homogenous particles with the average size around 100 nm.

##### 2. Turbidity and pH

**Table S1.** Turbidity of liposome UC-LP and CMCS-LP

| Samples       | UC-LP       | CMCS-LP     |
|---------------|-------------|-------------|
| Turbidity (T) | 0.840±0.012 | 0.865±0.019 |
| pH            | 7.51±0.05   | 7.38±0.06   |

Turbidity (T) is positively correlated to the particle size, slightly higher turbidity of CMCS-LP than UC-LP indicates a little bigger vesicle size. The pH of both liposomes is with the range of the PBS applied for the preparation of the liposomes.

### 3. Appearance of the samples during storage

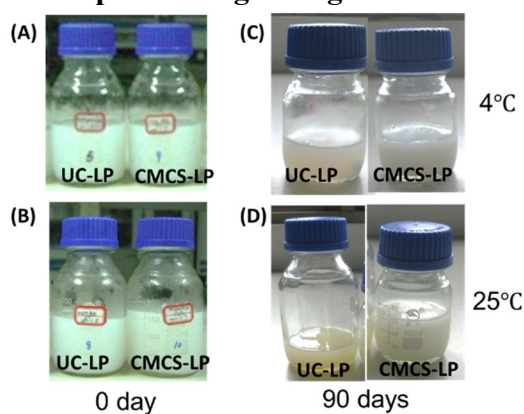

**Fig. S2** Pictures of UC-LP and CMCS-LP before and after storage at different temperatures. (A) Day 0 of 4°C storage samples; (B) Day 0 of 25 °C samples; (C) Day 90 of 4°C storage samples; (D) Day 90 of 25°C storage samples.

### 4. Differential scanning calorimetry (DSC)

The  $T_m$  of UC- LP and CMCS are 51.14°C and 114.18°C, respectively, with the CMCS-LP is 139.34 °C. The results indicate a higher stability of the CMCS-LP than that of the UC-LP.

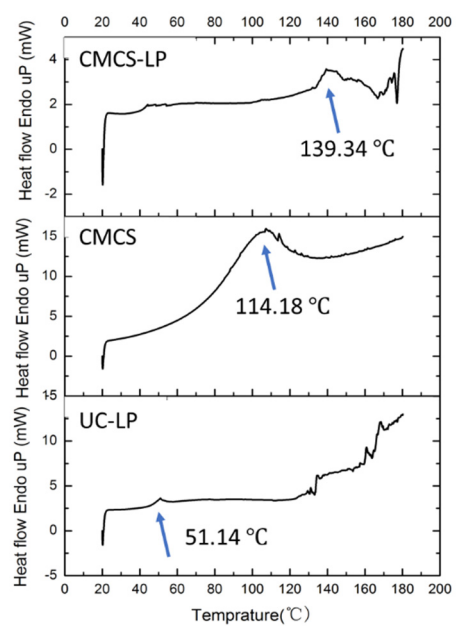

**Fig. S3** DSC curves of UC-LP, CMCS and CMCS-LP.
